# Supplementary material for: Air Health Trend Indicator: Association between Short-Term Exposure to Ground Ozone and Circulatory Hospitalizations in Canada for 17 Years, 1996–2012
Source: MDPI journal article supplement (doi:10.3390/ijerph15081566), 2018-07-24
Supplement: s1 [file s1]

## Supplementary Materials

In this appendix, we display a number of plots of the temporal evolution of 7-year weighted national posterior median associations between selected response variables (IHD hospitalizations and OHD hospitalizations) and a number of demographic sub-groups. In each case, the first displayed credible interval (yellow square) is for the entire time period (1996-2012 in all cases), while the following credible intervals (red circles) are for specific 7-year sub-groups.

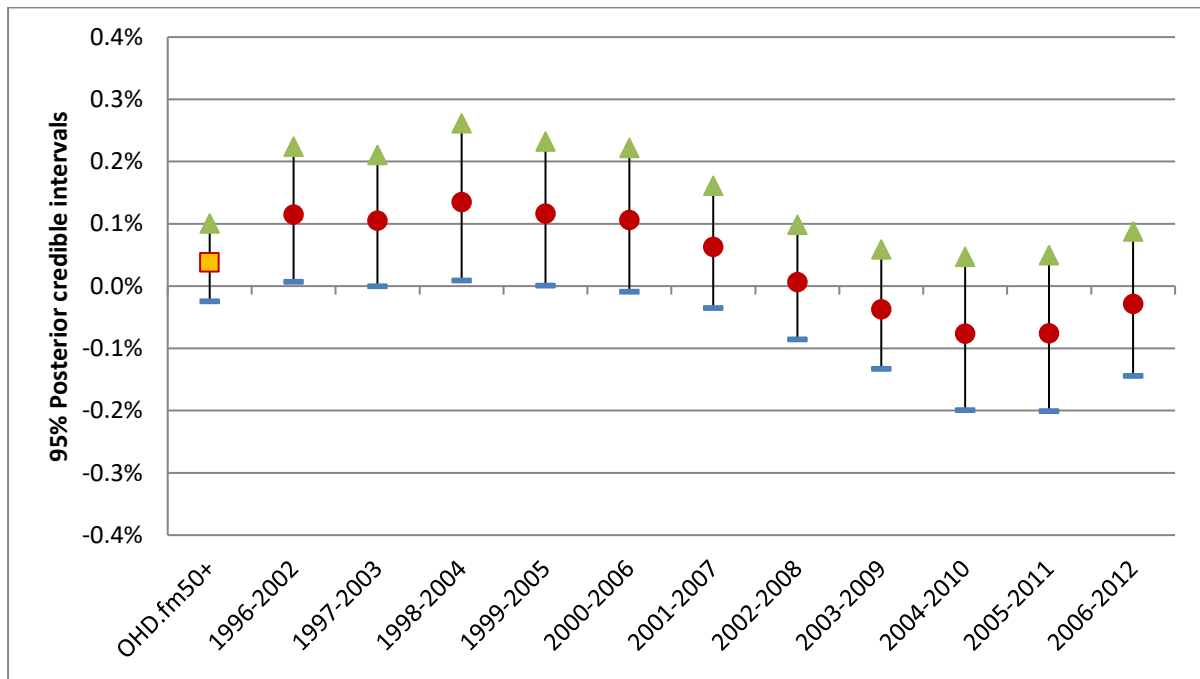

**Figure S1: over50 group.** 95% posterior intervals for the associations per 10 ppb 1-day lagged ozone with IHD hospitalizations for warm season: (a) 17 years combined risks (square in orange); (b) 11 annual risks (circles in red).

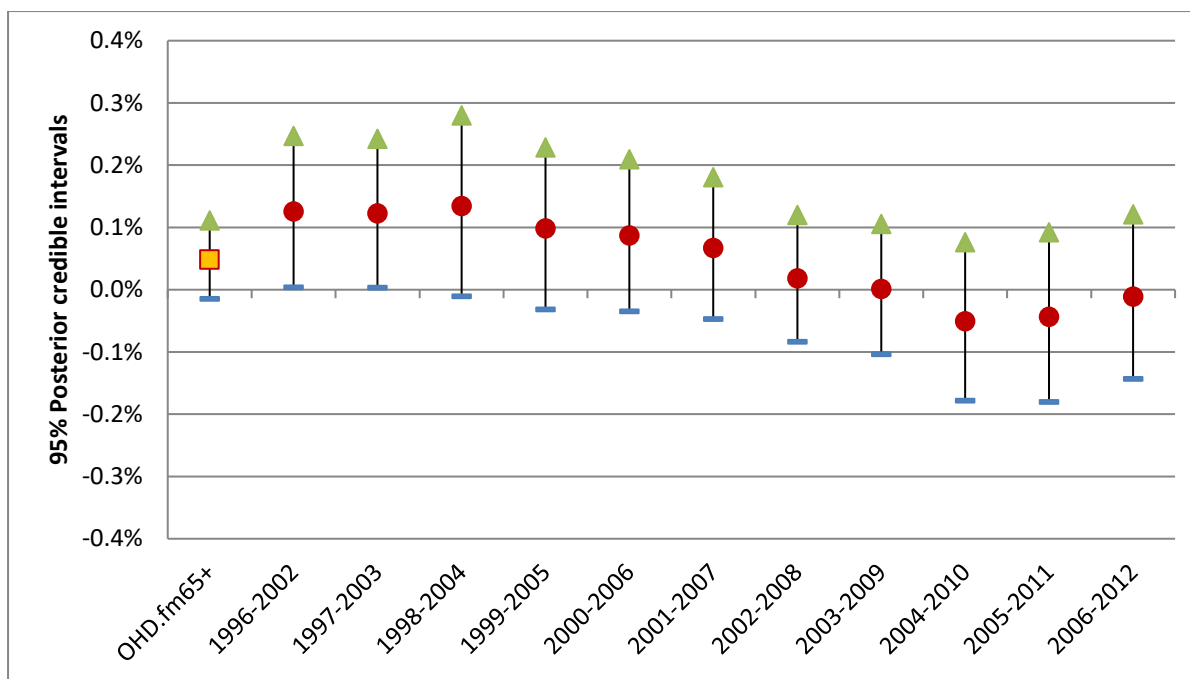

**Figure S2: Senior group.** 95% posterior intervals for the associations per 10 ppb 1-day lagged ozone with IHD hospitalizations for warm season: (a) 17 years combined risks (square in orange); (b) 11 annual risks (circles in red).

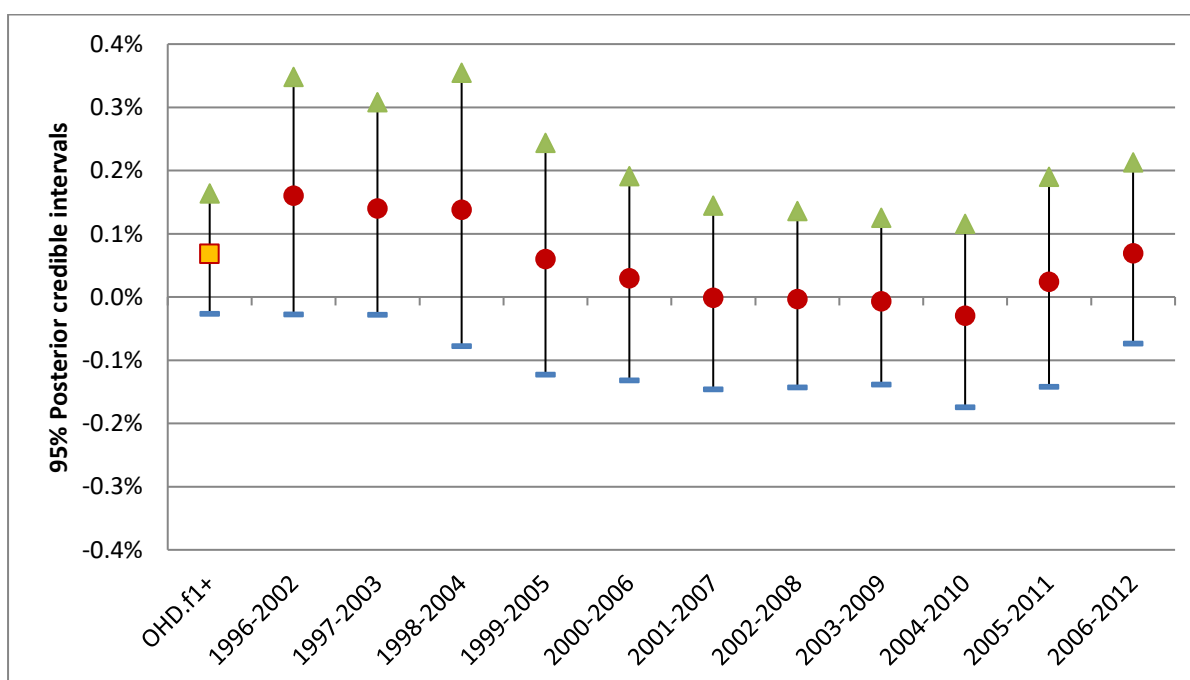

**Figure S3: Female group.** 95% posterior intervals for the associations per 10 ppb 1-day lagged ozone with IHD hospitalizations for warm season: (a) 17 years combined risks (square in orange); (b) 11 annual risks (circles in red).

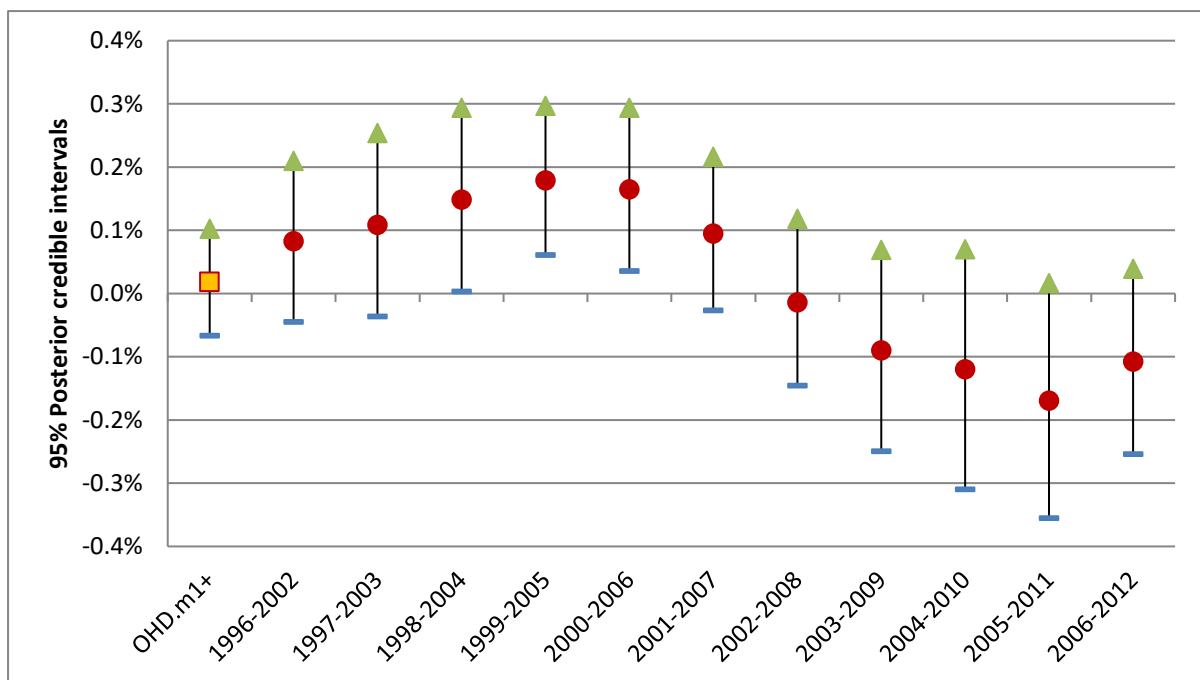

**Figure S4: Male group.** 95% posterior intervals for the associations per 10 ppb 1-day lagged ozone with IHD hospitalizations for warm season: (a) 17 years combined risks (square in orange); (b) 11 annual risks (circles in red).

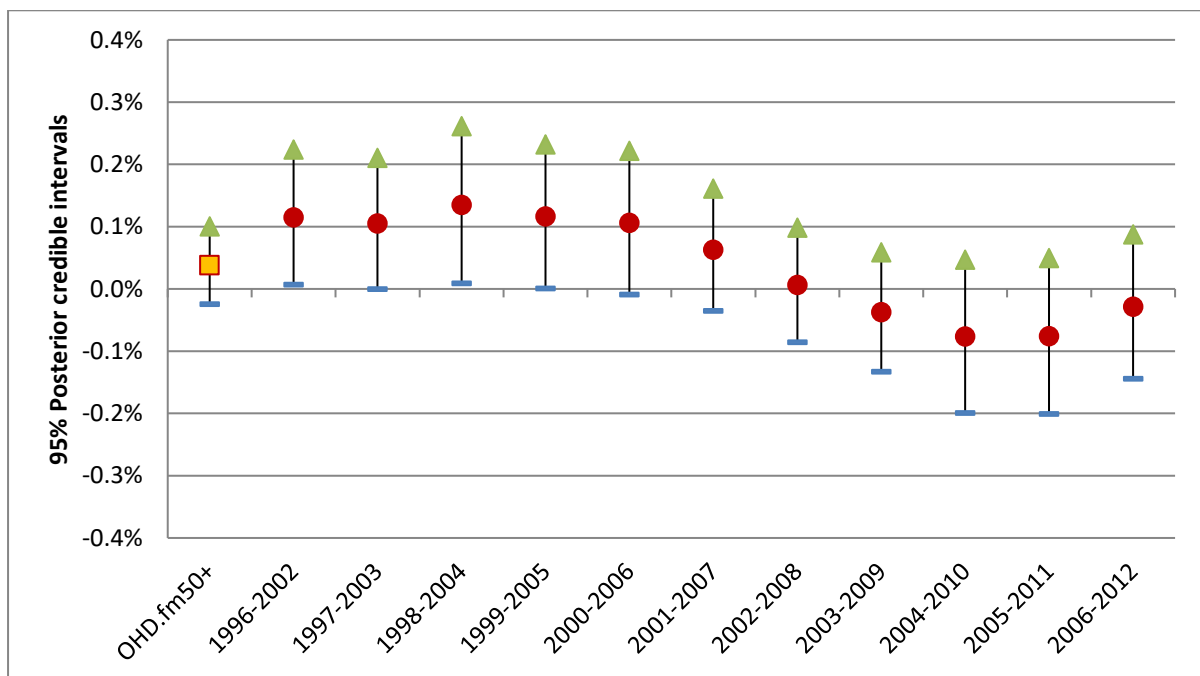

**Figure S5: over50 group.** 95% posterior intervals for the associations per 10 ppb 1-day lagged ozone with OHD hospitalizations for warm season: (a) 17 years combined risks (square in orange); (b) 11 annual risks (circles in red).



**Figure S6: Senior group.** 95% posterior intervals for the associations per 10 ppb 1-day lagged ozone with OHD hospitalizations for warm season: (a) 17 years combined risks (square in orange); (b) 11 annual risks (circles in red).



**Figure S7: Female group.** 95% posterior intervals for the associations per 10 ppb 1-day lagged ozone with OHD hospitalizations for warm season: (a) 17 years combined risks (square in orange); (b) 11 annual risks (circles in red).

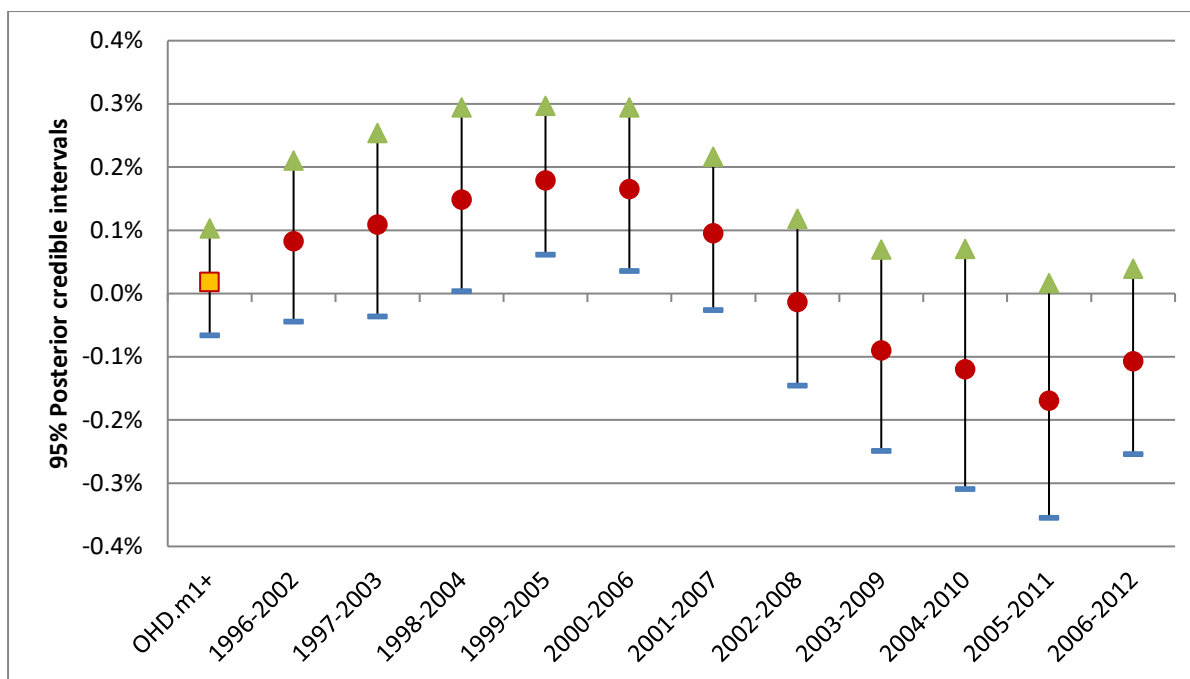

**Figure S8: Male group.** 95% posterior intervals for the associations per 10 ppb 1-day lagged ozone with OHD hospitalizations for warm season: (a) 17 years combined risks (square in orange); (b) 11 annual risks (circles in red).

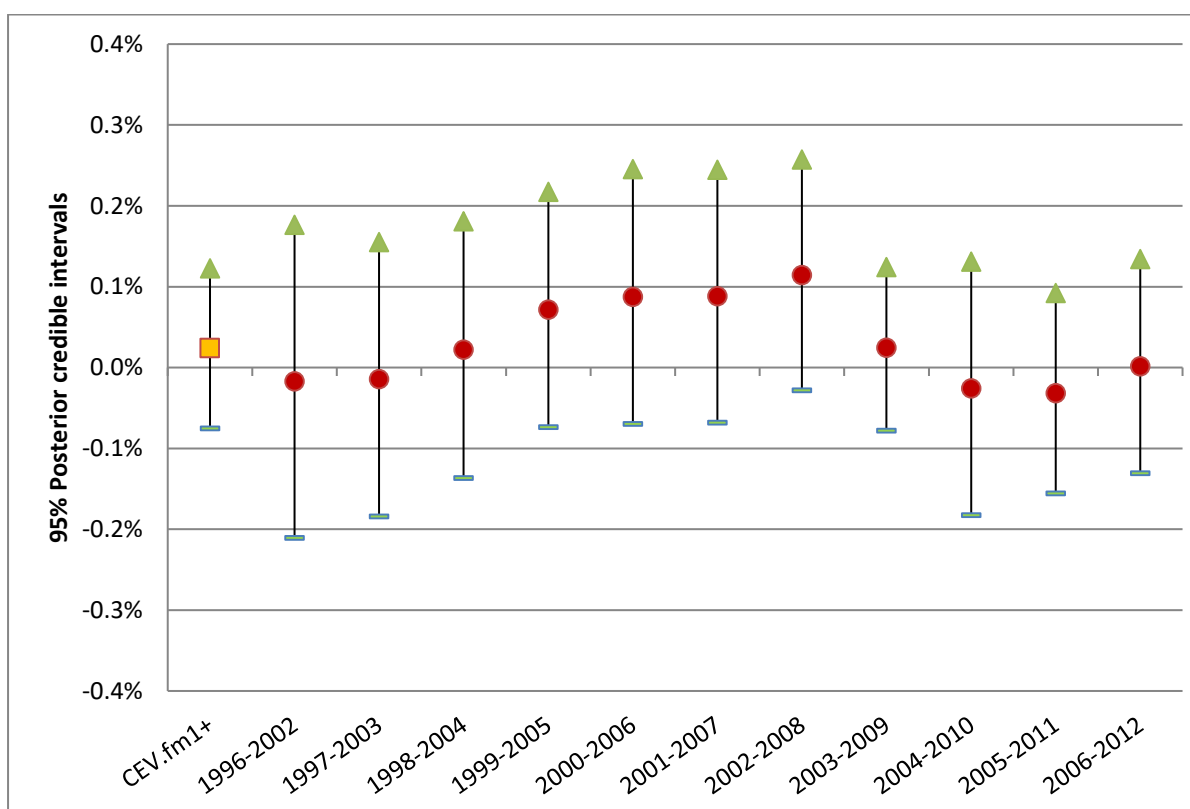

**Figure S9: Base group.** 95% posterior intervals for the associations per 10 ppb 1-day lagged ozone with CEV hospitalizations for warm season: (a) 17 years combined risks (square in orange); (b) 11 annual risks (circles in red).

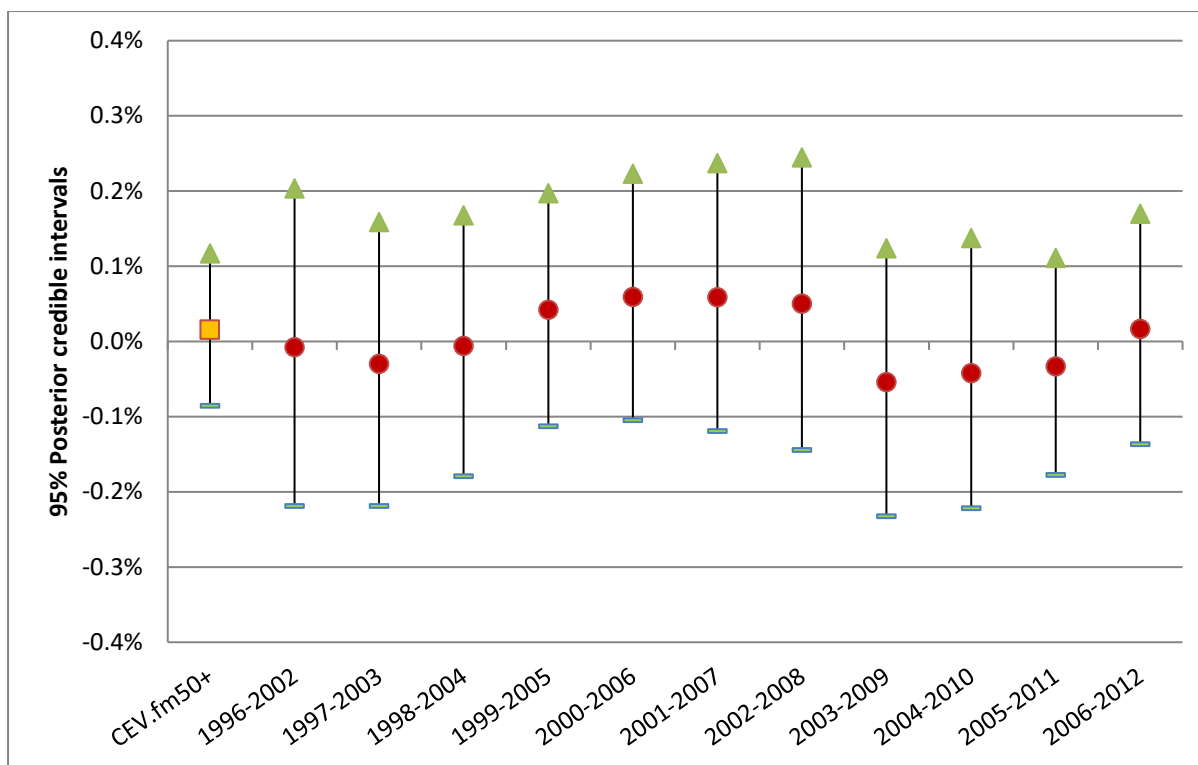

**Figure S10: over50 group.** 95% posterior intervals for the associations per 10 ppb 1-day lagged ozone with CEV hospitalizations for warm season: (a) 17 years combined risks (square in orange); (b) 11 annual risks (circles in red).

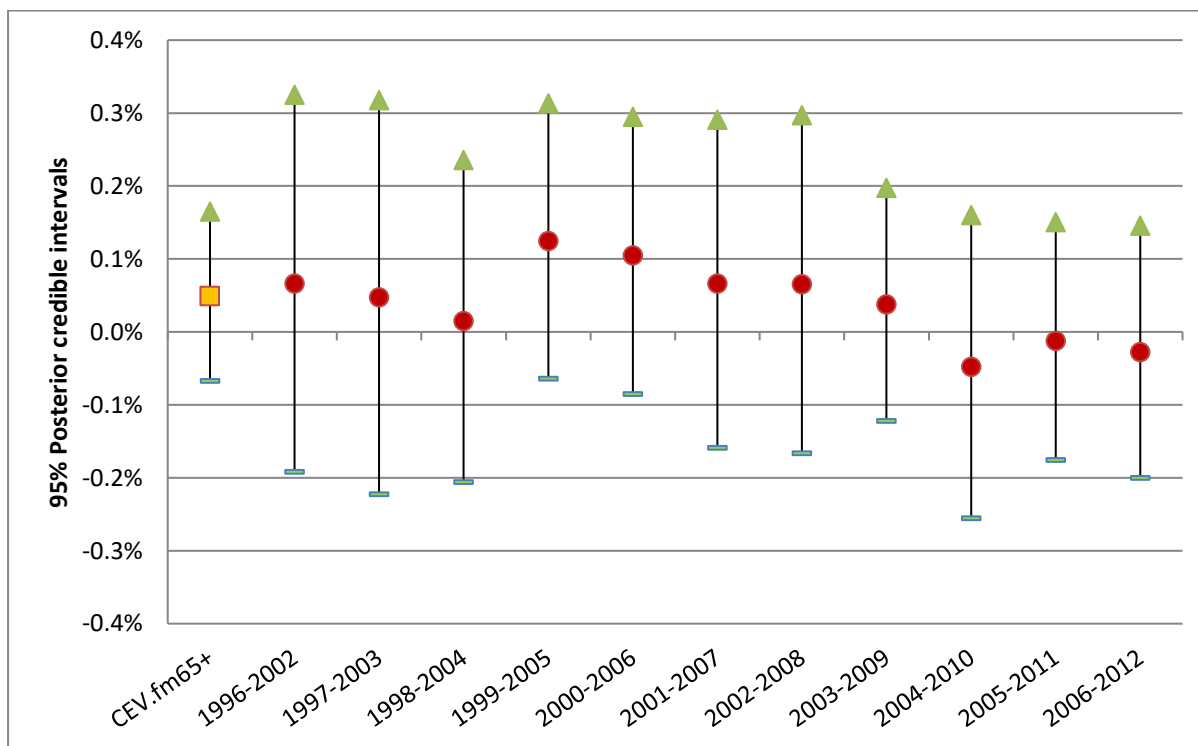

**Figure S11: Senior group.** 95% posterior intervals for the associations per 10 ppb 1-day lagged ozone with CEV hospitalizations for warm season: (a) 17 years combined risks (square in orange); (b) 11 annual risks (circles in red).

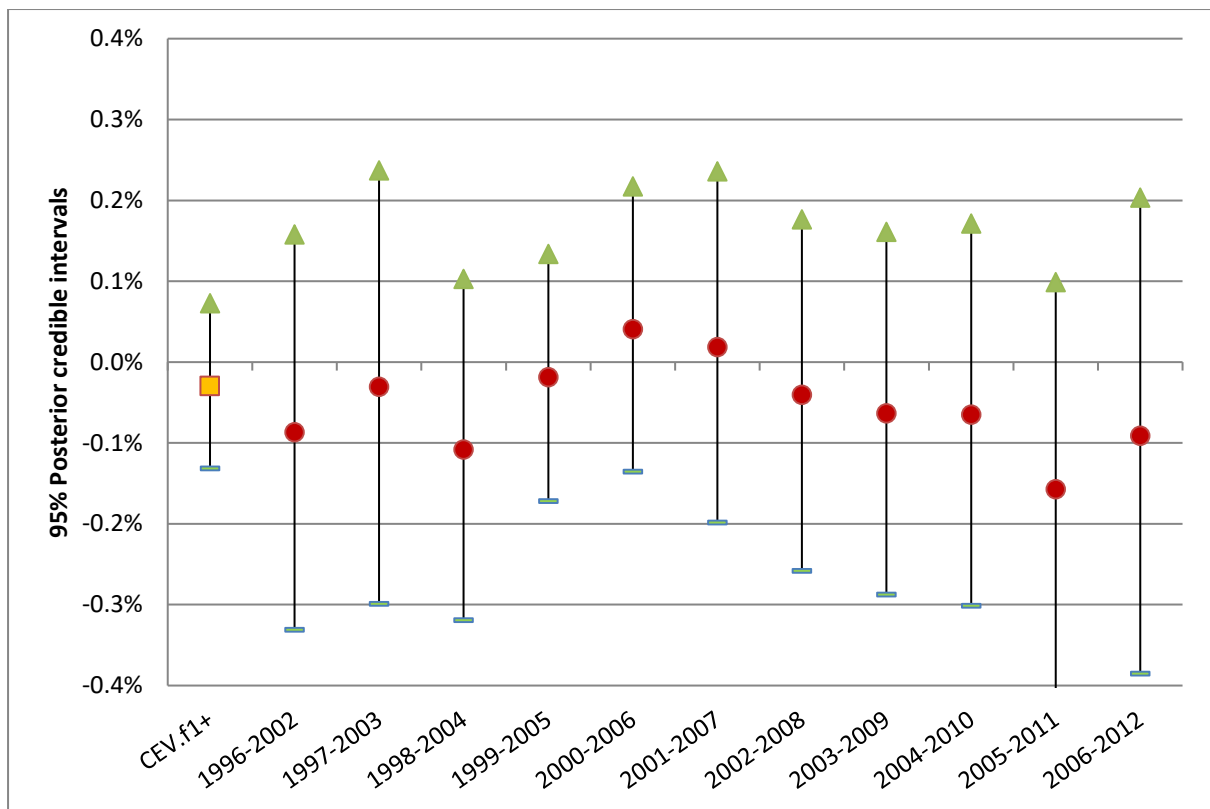

**Figure S12: Female group.** 95% posterior intervals for the associations per 10 ppb 1-day lagged ozone with CEV hospitalizations for warm season: (a) 17 years combined risks (square in orange); (b) 11 annual risks (circles in red).
